# Supplementary material for: Comparative Expression Profiling and Sequence Characterization of ATP1A1 Gene Associated with Heat Tolerance in Tropically Adapted Cattle
Source: Animals (Basel). 2021 Aug 11;11(8):2368. doi: 10.3390/ani11082368 (PMC8388727; doi:10.3390/ani11082368)
Supplement: Supplementary file 1 [file animals-11-02368-s001.zip › animals-1332528-supplementary.pdf]

## Supplementary materials

# Comparative Expression Profiling and Sequence Characterisation of ATP1A1 Gene Associated to Heat Tolerance in Tropically Adapted Cattle

Muhammed Elayadeth-Meethal<sup>1, 3, 5\*</sup>, Aravindakshan Thazhathu Veettil<sup>2</sup>, Muhasin Asaf<sup>1</sup>, S. Pramod<sup>3</sup>, Shane K Maloney<sup>4</sup>, Graem B Martin<sup>5</sup>, M. Jordana Rivero<sup>6</sup>, Veerasamy Sejian<sup>7</sup>, Punnoth Poonkuzhi Naseef<sup>3</sup>, Mohamed Saheer Kuruniyan<sup>9</sup>, Michael R.F. Lee<sup>10</sup>

<sup>1</sup>Department of Animal Breeding and Genetics, Kerala Veterinary and Animal Sciences University, Pookode, Wayanad, Kerala, 673576, India. [muhammed@kvasu.ac.in](mailto:muhammed@kvasu.ac.in);

<sup>2</sup>Centre for advanced studies in Animal Genetics and Breeding, Kerala Veterinary and Animal Sciences University, Pookode, Wayanad, Kerala, 680651, India. [aravindakshantv@kvasu.ac.in](mailto:aravindakshantv@kvasu.ac.in)

<sup>3</sup>Livestock Research Station, Thiruvazhamkunnu, Palakkad, Kerala, 678601, India. [pramod.s@kvasu.ac.in](mailto:pramod.s@kvasu.ac.in)

<sup>4</sup>School of Human Sciences, University of Western Australia, Crawley, WA, 6009, Australia [shane.maloney@uwa.edu.au](mailto:shane.maloney@uwa.edu.au)

<sup>5</sup>UWA School of Agriculture and Environment, University of Western Australia, Crawley, WA, 6009, Australia [graeme.martin@uwa.edu.au](mailto:graeme.martin@uwa.edu.au)

<sup>6</sup>Rothamsted Research, North Wyke, Devon, UK EX20 2SB. [jordana.rivero-viera@rothamsted.ac.uk](mailto:jordana.rivero-viera@rothamsted.ac.uk)

<sup>7</sup>ICAR-National Institute of Animal Nutrition and Physiology, Adugodi, Bangalore, 560030, India [drsejian@gmail.com](mailto:drsejian@gmail.com)

<sup>8</sup>Department of Pharmaceutics, Moulana College of Pharmacy, Perinthalmanna, Kerala, 679321, India. [drnaseefpp@gmail.com](mailto:drnaseefpp@gmail.com)

<sup>9</sup>Dept. of Dental Technology. COAMS. King Khalid University. Abha, 61421, Saudi Arabia. [mkurunian@kku.edu.sa](mailto:mkurunian@kku.edu.sa)

<sup>10</sup>Harper Adams University, Edgmond, Newport, TF10 8NB, UK. [MRFLee@harper-adams.ac.uk](mailto:MRFLee@harper-adams.ac.uk)

\* Correspondence: [muhammed@kvasu.ac.in](mailto:muhammed@kvasu.ac.in)

### Table of contents

1. Additional materials and methods -q-RT-PCR
2. Figures S1-S5

#### 1. Additional materials and methods -q-RT-PCR

For loading samples, the plate was placed into the Eco sample-loading dock, the notch was aligned with the matching indentation on the adapter. The dock light was turned on and the dock was inclined to a comfortable angle for pipetting. The samples and q-RT PCR reagents were pipetted into the plate and the plate was sealed with an Eco optical seal, which held the plate in place on the Eco sample loading dock, before the squeegee was dragged firmly across the surface to ensure the seal was secure. The plate adapter with sealed plate was placed into a plate centrifuge along with a second plate adapter for balance. The plate was centrifuged at 250 x g for 30 sec. The Eco lid was opened and the plate was placed on the block, and the notch aligned against the top left corner. The lid was closed and the reaction was started.

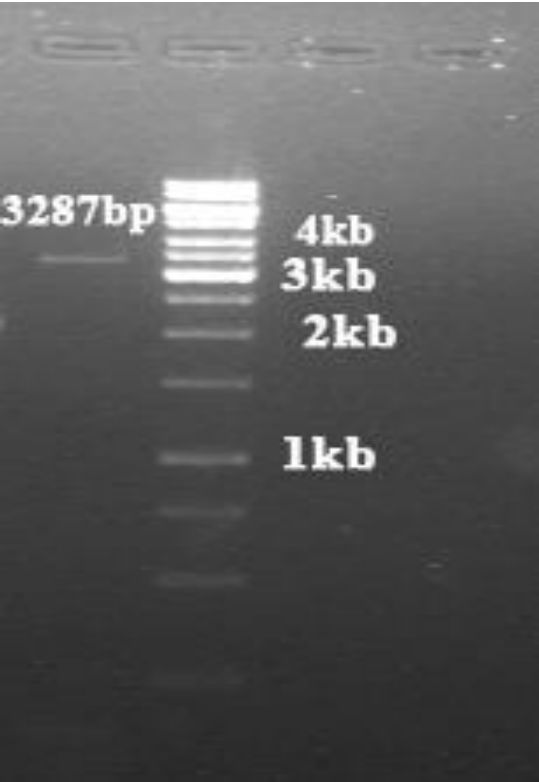

**Figure S1.** Gel demonstrating the 3287 bp PCR amplified product of ATP1A1 gene of Vechur cattle in 1% agarose gel (M- 1 Kb DNA Marker, A-ATP1A1 gene- 3287bp)

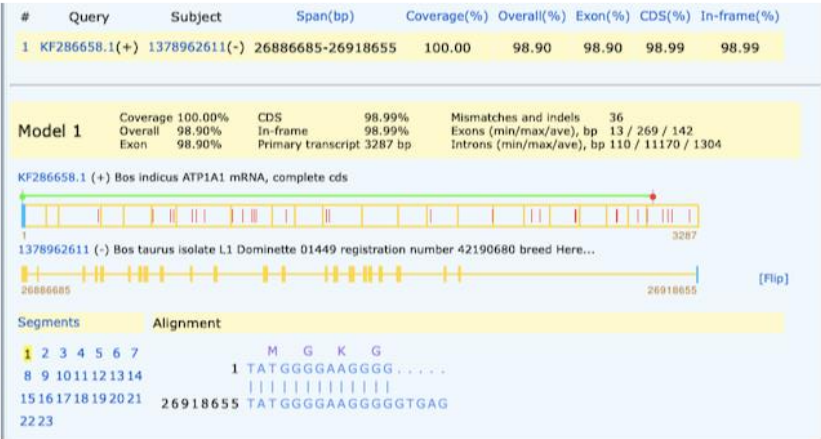

**Figure S2.** Results of mRNA (cDNA) to genomic alignment created by Splign. Graphical view the alignment between Vechur ATP1A1 sequence KF 286658.1 and Bos taurus reference genome (1378962611).

| # | Query         | Subject       | Span(bp)          | Coverage(%) | Overall(%) | Exon(%) | CDS(%) | In-frame(%) |
|---|---------------|---------------|-------------------|-------------|------------|---------|--------|-------------|
| 1 | KF286658.1(+) | 1378962611(-) | 26886685-26918655 | 100.00      | 98.90      | 98.90   | 98.99  | 98.99       |

  

| #  | Query      | Subject    | Idty  | Len | Q.Start | Q.Fin | S.Start  | S.Fin    | Type       | Details |
|----|------------|------------|-------|-----|---------|-------|----------|----------|------------|---------|
| +1 | KF286658.1 | 1378962611 | 1     | 13  | 1       | 13    | 26918655 | 26918643 | GC<exon>GT | M13     |
| +1 | KF286658.1 | 1378962611 | 1     | 105 | 14      | 118   | 26907473 | 26907369 | AG<exon>GT | M105    |
| +1 | KF286658.1 | 1378962611 | 1     | 60  | 119     | 178   | 26906748 | 26906689 | AG<exon>GT | M60     |
| +1 | KF286658.1 | 1378962611 | 0.995 | 204 | 179     | 382   | 26904610 | 26904407 | AG<exon>GT | M194RM  |
| +1 | KF286658.1 | 1378962611 | 1     | 114 | 383     | 496   | 26903734 | 26903621 | AG<exon>GT | M114    |
| +1 | KF286658.1 | 1378962611 | 0.993 | 135 | 497     | 631   | 26903240 | 26903106 | AG<exon>GT | M134R   |
| +1 | KF286658.1 | 1378962611 | 0.975 | 118 | 632     | 749   | 26902996 | 26902879 | AG<exon>GT | M8RM8   |
| +1 | KF286658.1 | 1378962611 | 0.985 | 269 | 750     | 1018  | 26902427 | 26902159 | AG<exon>GT | M82R2N  |
| +1 | KF286658.1 | 1378962611 | 0.97  | 199 | 1019    | 1217  | 26901627 | 26901429 | AG<exon>GT | M8RM4   |
| +1 | KF286658.1 | 1378962611 | 0.991 | 110 | 1218    | 1327  | 26901177 | 26901068 | AG<exon>GT | M69RM   |
| +1 | KF286658.1 | 1378962611 | 1     | 135 | 1328    | 1462  | 26899140 | 26899006 | AG<exon>GT | M135    |
| +1 | KF286658.1 | 1378962611 | 0.99  | 193 | 1463    | 1655  | 26898344 | 26898152 | AG<exon>GT | M18RM   |
| +1 | KF286658.1 | 1378962611 | 1     | 176 | 1656    | 1831  | 26895939 | 26895764 | AG<exon>GT | M176    |
| +1 | KF286658.1 | 1378962611 | 1     | 137 | 1832    | 1968  | 26894778 | 26894642 | AG<exon>GT | M137    |
| +1 | KF286658.1 | 1378962611 | 0.987 | 151 | 1969    | 2119  | 26893393 | 26893243 | AG<exon>GT | M21R2N  |
| +1 | KF286658.1 | 1378962611 | 1     | 169 | 2120    | 2288  | 26892646 | 26892478 | AG<exon>GT | M169    |
| +1 | KF286658.1 | 1378962611 | 0.994 | 155 | 2289    | 2443  | 26892363 | 26892209 | AG<exon>GT | MRM15   |
| +1 | KF286658.1 | 1378962611 | 0.984 | 124 | 2444    | 2567  | 26891837 | 26891714 | AG<exon>GT | M37RM   |
| +1 | KF286658.1 | 1378962611 | 0.986 | 146 | 2568    | 2713  | 26890567 | 26890422 | AG<exon>GT | M124RM  |
| +1 | KF286658.1 | 1378962611 | 1     | 131 | 2714    | 2844  | 26890296 | 26890166 | AG<exon>GT | M131    |
| +1 | KF286658.1 | 1378962611 | 0.971 | 102 | 2845    | 2946  | 26889676 | 26889575 | AG<exon>GT | M48R2N  |
| +1 | KF286658.1 | 1378962611 | 0.989 | 92  | 2947    | 3038  | 26887511 | 26887420 | AG<exon>GT | M52RM   |
| +1 | KF286658.1 | 1378962611 | 0.972 | 249 | 3039    | 3287  | 26886933 | 26886685 | AG<exon>   | M4R2M   |

**Figure S3.** Tabular format for the alignment between Vechur ATP1A1 sequence KF 286658.1 and Bos taurus reference genome (1378962611).

```
>lcl|Seg1 gb|KF286658.1| [1,13] x gi|1378962611
TATGGGGAAGGGG
>lcl|Seg2 gb|KF286658.1| [14,118] x gi|1378962611
GTTGGACGTGATAAATATGAACCGGCAGCTGTTTCAGAGCATGGGGACAAGAAAAAGCCAAGAAAGAGA
GGGATATGGACGAGCTGAAGAAAGAAGTTTCTATG
>lcl|Seg3 gb|KF286658.1| [119,178] x gi|1378962611
GATGATCATAAACTTAGCCTTGATGAACTTCATCGCAAATATGGAACAGACTTGAGCCGA
>lcl|Seg4 gb|KF286658.1| [179,382] x gi|1378962611
GGCTTAACAACTGCTCGAGCTGCCGAGATCCTAGCCAGAGATGGACCCAACGCCCTCACGCCCCCTCCCA
CGACCCCTGAATGGGTCAAGTTCTGTGACAGCTGTTTGGGGGGTTCTCAATGTTACTGTGGATTGGAGC
AGTTCTTTGCTTCTCGCCTATGGTATCCAAGCTGCTACAGAAGAGGAACCTCACAATGATAAT
>lcl|Seg5 gb|KF286658.1| [383,496] x gi|1378962611
CTGTACCTTGGTGTGGTGTCTGTGCTGCTCATATAACCGGGTGTTCCTCTACTATCAAGAAGCTA
AAAGCTCAAAGATCATGGAGTCTTCAAAAACATGGTTCCTCAG
>lcl|Seg6 gb|KF286658.1| [497,631] x gi|1378962611
CAAGCCCTCGTGATTGCAAAATGGTGAGAAAATGAGCATAAATGCGGAAGAGGTTGTCGTGCGAGATCTGG
TGAAGTGAAAGGAGGGGATCGAATTCCTGCCGATCTCAGGATCATTCTGCAAATGGCTGCAAC
>lcl|Seg7 gb|KF286658.1| [632,749] x gi|1378962611
GTGGATAAGTCTCACTCACGGGAGAATCAGAGCCACAGACCAGGTCTCCGGATTTACCAATGAAAATC
CCCTGGAGACACGGAACATTGCCTTATTTCAACTAAGTGTGTTGAAG
>lcl|Seg8 gb|KF286658.1| [750,1018] x gi|1378962611
GCACTGCACGTGGCATTGTCGTGTATACTGGGGATCGAACCGTGATGGGCAGAAATTGCCACGCTGGCTTC
TGGGCTGGAGGGCCGCCAGACTCCCATCGCTGCCGAAATTGAACATTTTATCCACATCATCACGGGTGTG
GCGGTGTTCTTGGCGGTGTCGTTCTTCATCCTTTCTCTGATCCTTGAGTACACCTGGCTGGAGGCTGTCA
TCTTCCTCATCGGCATCATTGTAGCCAACGTGCCAGAGGGTTTGTGCGCCACCGTCACG
>lcl|Seg9 gb|KF286658.1| [1019,1217] x gi|1378962611
GTGTGCCCTCAGCTGACTGCAAAAGCGCATGGCCAGGAAAACTGCTTAGTGAAGAACTGGAGGCTGTGG
AGACCTTGGGATCCACGTCCACCATCTGCTCGGACAAAACCTGGCCCTCTGACCGAGAACCGAATGACAGT
GGCCACATGTGGTTCGACAACCAAATCCACGAGGCGGACACGACAGAGAATCAGAGCG
>lcl|Seg10 gb|KF286658.1| [1218,1327] x gi|1378962611
GTGTTTCATTTGACAAGACTTCGGCCACGTGGCTCGCTCTGTCCAGAATTGCAGGTCTTTGTAACAGGGG
CGTGTTCAGGCTAACCAGGATAACCTGCCTATCCTGAAG
>lcl|Seg11 gb|KF286658.1| [1328,1462] x gi|1378962611
CGGGCTGTAGCGGTGATGCCTCAGAGTCTGCGCTCCTGAAGTGCATTGAGGTGTGCTGCGGTTCTGTGA
AGGAGATGAGAGAGAGATACACCAAGATCGTCGAGATCCCATCACTCCACCAACAAGTACCAG
```

```

>lcl|Seg12 gb|KF286658.1| [1463,1655] x gi|1378962611
TTATCCATCCACAAGAACCCCAATGCAGGTGAGCCCCGCCACCTACTGGTGATGAAAGGTGCCCCAGAAA
GGATCTTGGACCGCTGCAGCTCCATCCTCATCCATGGCAAGGAGCAGCCCCGGACGAGGAGCTGAAGGA
CGCTTTTCAGAAATGCCTACCTGGAGCTGGGTGGCCTCGGAGAGCGTGTGCTGG
>lcl|Seg13 gb|KF286658.1| [1656,1831] x gi|1378962611
GTTTTTGCCACTTGCTGCTGCCAGATGAGCAGTTTCCTGAAGGCTTCCAGTTTGACACCGACGATGTGAA
CTTCCCTGTTGATAATCTCTGCTTCGTGGGACTCATCTCCATGATTGACCCACCACGGGCTGCTGTCCCA
GATGCTGTGGGCAAATGCCGAAGTGTGGAATCAAG
>lcl|Seg14 gb|KF286658.1| [1832,1968] x gi|1378962611
GTCATCATGGTCACCGAGACCATCCCATCACTGCCAAAGCCATTGCCAAAGGTGTGGGGATCATCTCAG
AAGGTAATGAGACTGTAGAAGACATTGCTGCCCGCCTCAACATCCAGTGAGCCAGGTGAACCCAG
>lcl|Seg15 gb|KF286658.1| [1969,2119] x gi|1378962611
GGATGCCCGGGCTGCGTGGTGGATGGAAGTGATCTGAAGGACATGACTCCCGAGCAGCTGGATGACATC
TTGAAGTACCACACAGAGATTGTGTTGCCAGGACCTCTCCGAGCAGAAGCTCATCATTGTGGAAGGCT
GCCAGAGACAG
>lcl|Seg16 gb|KF286658.1| [2120,2288] x gi|1378962611
GGTGCCATCGTGGCTGTAAC TGAGACGGTGTCAATGACTCCCCGGCTTTGAAGAAGGCAGACATTGGGG
TTGCCATGGGGATTGCAGGCTCAGACGTGTCTAAGCAAGCTGCTGACATGATTCTCTTAGATGACAAC TT
TGCCTCAATTGTGACTGGAGTAGAGGAAG
>lcl|Seg17 gb|KF286658.1| [2289,2443] x gi|1378962611
GACGTCTGATCTTTGATAACTTGAAGAAATCCATTGCTTATACCCTCACCAGTAACATTCCTGAGATTAC
CCCCCTCCTGATATTATTATTGCAAACATTCCACTCCCTCTGGGGACCGCTACCATCCTCTGCATCGAC
TTGGGAACGGACATG
>lcl|Seg18 gb|KF286658.1| [2444,2567] x gi|1378962611
GTCCCTGCTATCTCCTTGGCTTATGAGCAGGCTGAGACCGACATCATGAAGAGGCAGCCAGAAACCCCG
AGACGGACATACTCGTGAACGAGCGGCTGATCAGCATGGCCTATGGACAGATTG
>lcl|Seg19 gb|KF286658.1| [2568,2713] x gi|1378962611
GTATGATCCAGGCCCTGGGGGGCTTCTTCACTTACTTTGTTATCATGGCTGAGAACGGCTTCCTCCCAAA
TCACCTGCTGGGCATCCGAGTGACCTGGGATGACCGTTGGATCAACGATGTGGACGACACCTATGGGCAG
CAGTGG
>lcl|Seg20 gb|KF286658.1| [2714,2844] x gi|1378962611
ACCTATGAACAGAGGAAGATTGTGGAGTTCACCTGCCACACGGCCTTCTTGTCTAGTATCGTGGTGGTGC
AGTGGGCTGACCTGGTCATCTGCAAGACCAGGAGGAATTCTGTCTTCCAGCAGGGGATGAA
>lcl|Seg21 gb|KF286658.1| [2845,2946] x gi|1378962611
GAACAAGATCTTAATATTGGCCTCTTTGAAGAGACAGCCCTTGCTGCAATCCTTTCTACTGCCCTGGA
ATGGGTGTTGCCCTGAGGATGTATCCCTCAA

>lcl|Seg22 gb|KF286658.1| [2947,3038] x gi|1378962611
ACCTACCTGGTGGTTCTGTGCCTTCCCCTACTCTCTTCTCATCTTCGTGTATCACGAAGTCCGGAAGCTC
ATCATCAGGCGACGTCCTGGCG
>lcl|Seg23 gb|KF286658.1| [3039,3287] x gi|1378962611
GTTGCCTGGAGAAGGAGACCTACTACTAGACCCCTCCTGCACGCGTGGAGCATCATGCCACAACTCT
GCACCCACGACCCACCCCTCTTTGTGTACTTCATTCTTGGAATTCAGAAATCCACGCTGGTAGGAAAGC
ACCGAAGCATGTGGGAAGGGAGACGTCCCGAATGAAGCATGTAGCTCTATGGGGGGGTGGGGGTGGG
AAGAGGGGTGCCCGAGAAACATCCGTCTGTGGAACGAC

```

**Figure S4.** Segments and boundaries of the aligned regions of 23 exons between Vechur ATP1A1 sequence (KF 286658.1) and *Bos taurus* reference genome (1378962611).

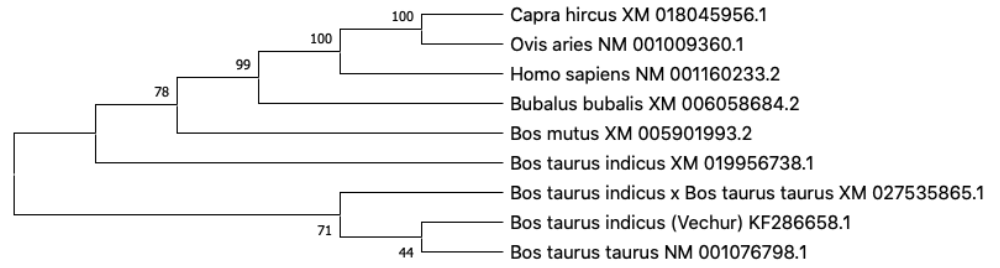

**Figure S5.** The evolutionary history of ATP1A1 gene in Vechur cattle inferred using the Neighbor-Joining method. The optimal tree with the sum of branch length = 0.12680380 is shown. The percentage of replicate trees in which the associated taxa clustered together in the bootstrap test (1000 replicates) are shown next to the branches.
